# Supplementary material for: Myocyte enhancer factor 2A delays vascular endothelial cell senescence by activating the PI3K/p-Akt/SIRT1 pathway
Source: publisher site journal article supplement (doi:10.18632/aging.102015), 2019-06-10
Supplement: Supplementary file [file aging-v11i11-102015-supplementary-material-SD1.pdf]

**SUPPLEMENTARY FIGURE**

**Descriptive Statistics**

|        | Mean     | Std. Deviation | N   |
|--------|----------|----------------|-----|
| MEF2A  | .999983  | .5032107       | 194 |
| CAD    | .608247  | .4894049       | 194 |
| age    | 6.6979E1 | 10.2380772     | 194 |
| Gender | 1.4484E0 | .4986226       | 194 |

**Correlations**

| Control Variables   |        |                         | MEF2A | CAD   | age   | Gender |
|---------------------|--------|-------------------------|-------|-------|-------|--------|
| -none- <sup>a</sup> | MEF2A  | Correlation             | 1.000 | -.221 | -.014 | -.154  |
|                     |        | Significance (2-tailed) | .     | .002  | .841  | .032   |
|                     |        | df                      | 0     | 192   | 192   | 192    |
|                     | CAD    | Correlation             | -.221 | 1.000 | -.166 | -.317  |
|                     |        | Significance (2-tailed) | .002  | .     | .021  | .000   |
|                     |        | df                      | 192   | 0     | 192   | 192    |
|                     | age    | Correlation             | -.014 | -.166 | 1.000 | .322   |
|                     |        | Significance (2-tailed) | .841  | .021  | .     | .000   |
|                     |        | df                      | 192   | 192   | 0     | 192    |
|                     | Gender | Correlation             | -.154 | -.317 | .322  | 1.000  |
|                     |        | Significance (2-tailed) | .032  | .000  | .000  | .      |
|                     |        | df                      | 192   | 192   | 192   | 0      |
| age & Gender        | MEF2A  | Correlation             | 1.000 | -.286 |       |        |
|                     |        | Significance (2-tailed) | .     | .000  |       |        |
|                     |        | df                      | 0     | 190   |       |        |
|                     | CAD    | Correlation             | -.286 | 1.000 |       |        |
|                     |        | Significance (2-tailed) | .000  | .     |       |        |
|                     |        | df                      | 190   | 0     |       |        |

a. Cells contain zero-order (Pearson) correlations.

Supplementary Figure 1. Pearson correlation analysis for CAD and plasma MEF2A level by controlling age and gender.
